# Supplementary material for: Discovering non-additive heritability using additive GWAS summary statistics
Source: bioRxiv preprint, doi:10.1101/2022.07.21.501001, version 5 (2024-04-15)
Supplement: Supplemental File 2 [file 501001_file05.xlsx]

## Sheet: Sheet1
Estimated Phenotypic Variance Explained (PVE)
Parameter ρ	LDSC	i-LDSC (+/- 5 SNPs)	i-LDSC (+/- 10 SNPs)	i-LDSC (+/- 25 SNPs)	i-LDSC (+/- 50 SNPs)	i-LDSC (Average)
0.2	0.368 (0.002)	0.862 (0.007)	0.683 (0.006)	0.530 (0.004)	0.473 (0.004)	0.637 (0.008)
0.4	0.420 (0.002)	0.780 (0.006)	0.649 (0.005)	0.537 (0.004)	0.500 (0.004)	0.616 (0.006)
0.6	0.478 (0.002)	0.700 (0.006)	0.616 (0.005)	0.546 (0.004)	0.520 (0.004)	0.595 (0.004)
0.8	0.540 (0.002)	0.650 (0.006)	0.608 (0.005)	0.574 (0.004)	0.561 (0.004)	0.599 (0.003)
Mean Absolute Error (MAE)
Parameter ρ	LDSC	i-LDSC (+/- 5 SNPs)	i-LDSC (+/- 10 SNPs)	i-LDSC (+/- 25 SNPs)	i-LDSC (+/- 50 SNPs)	i-LDSC (Average)
0.2	0.232 (0.002)	0.262 (0.007)	0.083 (0.006)	0.070 (0.004)	0.127 (0.004)	0.037 (0.008)
0.4	0.180 (0.002)	0.180 (0.007)	0.049 (0.005)	0.063 (0.004)	0.104 (0.004)	0.016 (0.006)
0.6	0.124 (0.002)	0.100 (0.006)	0.016 (0.005)	0.054 (0.004)	0.080 (0.004)	0.005 (0.004)
0.8	0.061 (0.002)	0.050 (0.006)	0.009 (0.005)	0.026 (0.004)	0.039 (0.004)	0.001 (0.003)
